# Supplementary material
Source: PubMed Central journal article supplement (PMC263797)

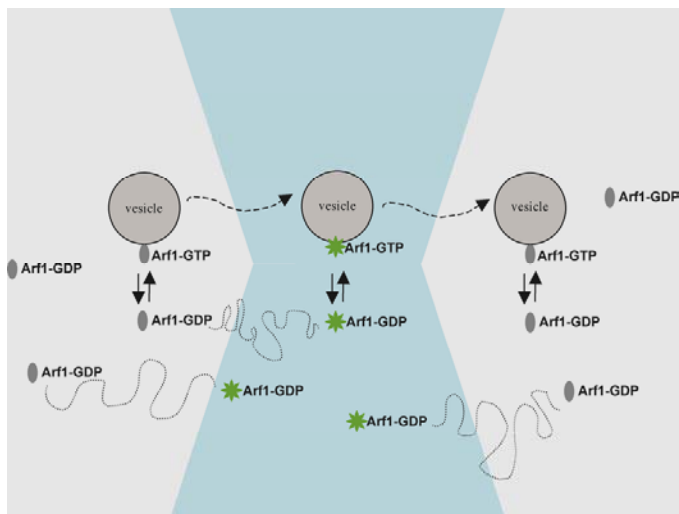

Supplement: pnas_100_23_13314__10.pdf [file pnas_100_23_13314__10.pdf]

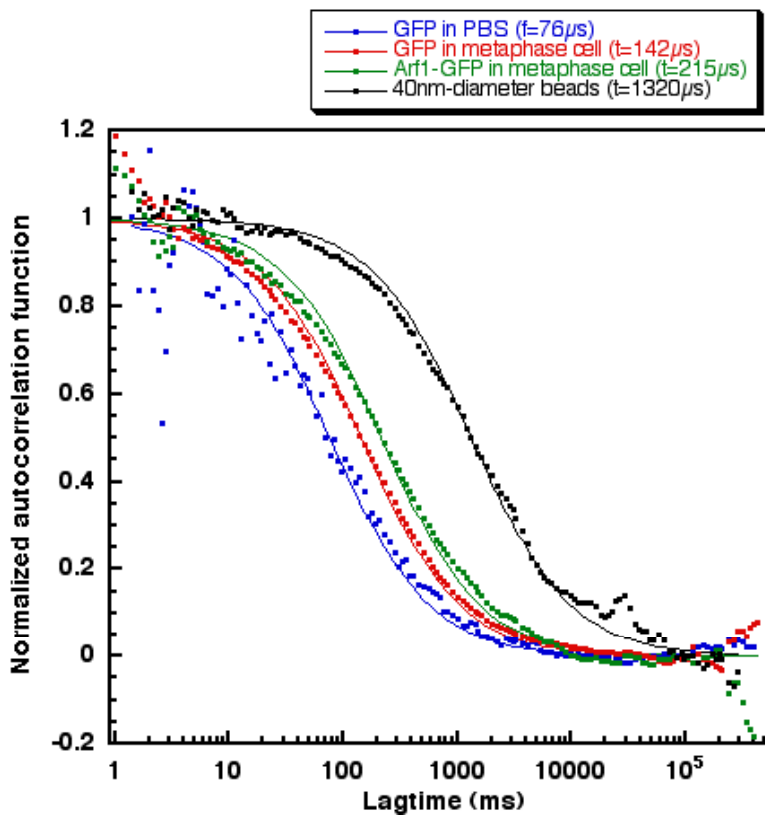

Supplement: pnas_100_23_13314__11.pdf [file pnas_100_23_13314__11.pdf]

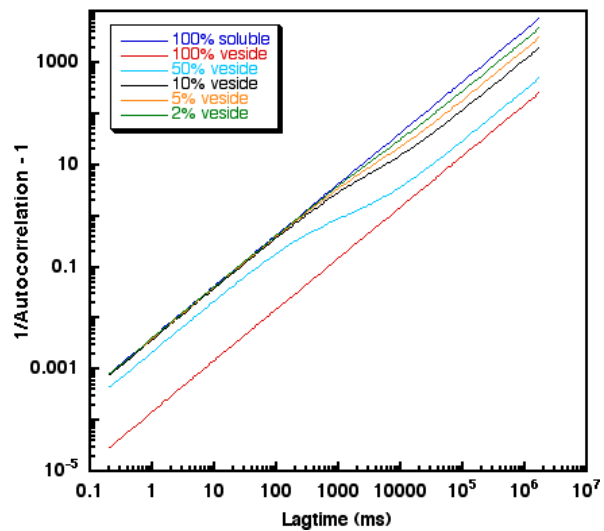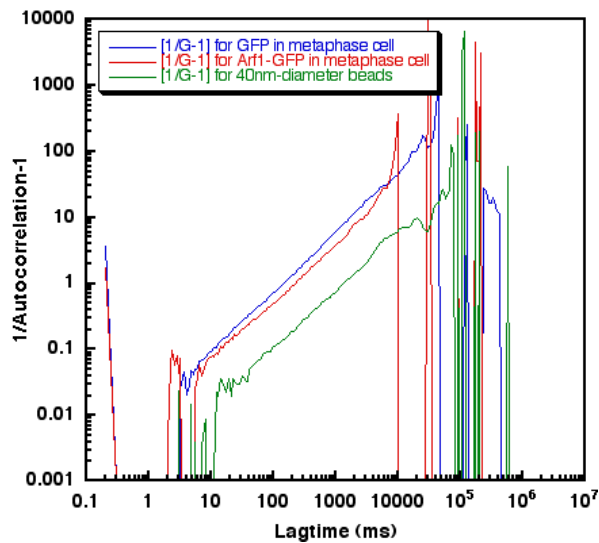

Supplement: pnas_100_23_13314__13.pdf [file pnas_100_23_13314__13.pdf]

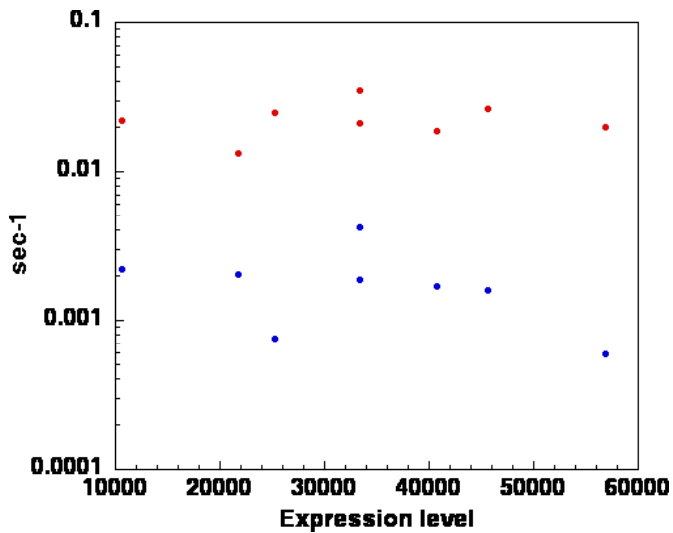

Supplement: pnas_100_23_13314__15.pdf [file pnas_100_23_13314__15.pdf]

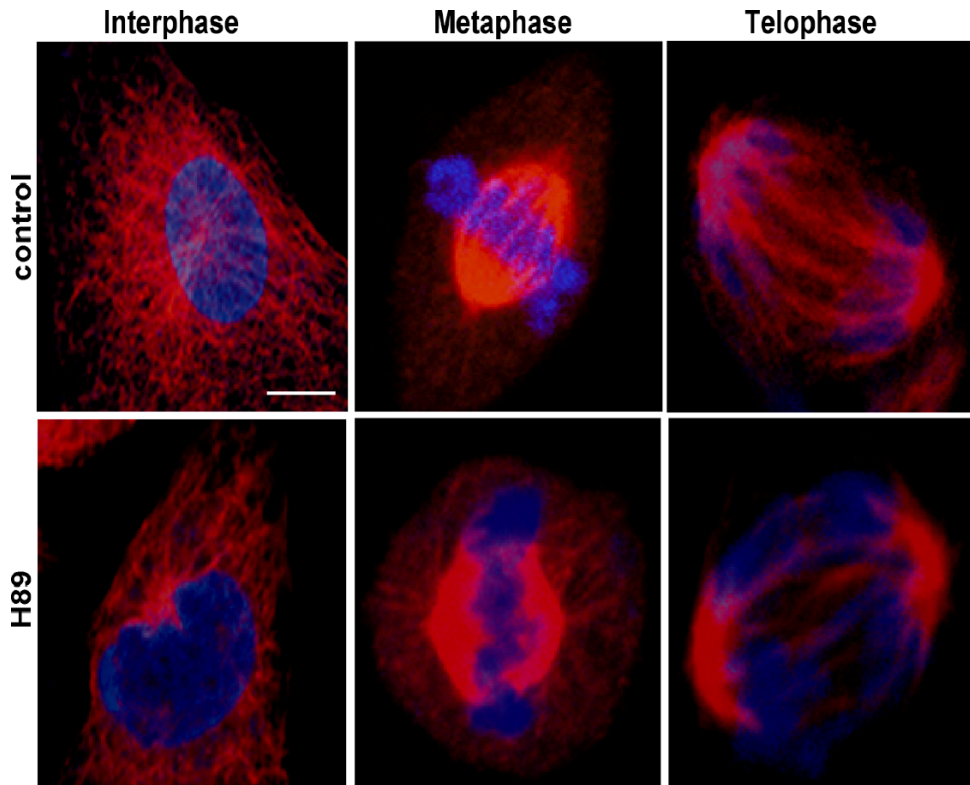

Supplement: pnas_100_23_13314__3.pdf [file pnas_100_23_13314__3.pdf]

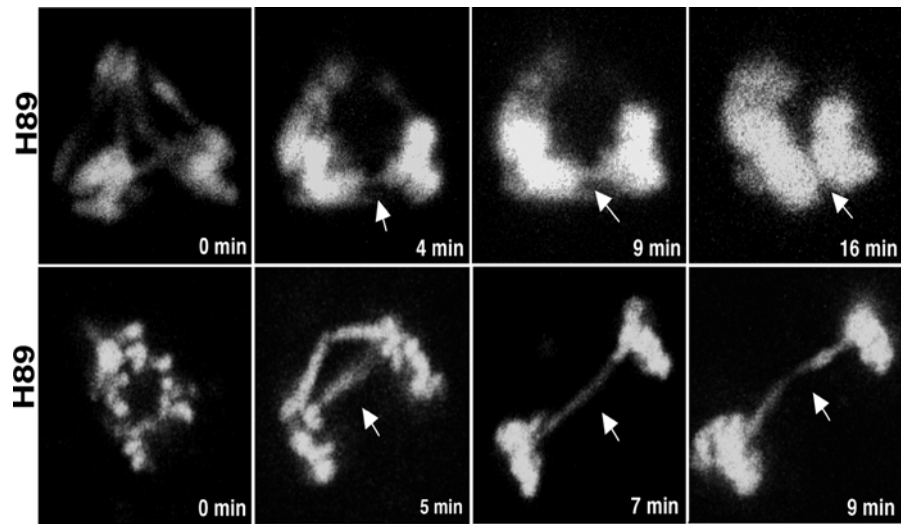

Supplement: pnas_100_23_13314__4.pdf [file pnas_100_23_13314__4.pdf]

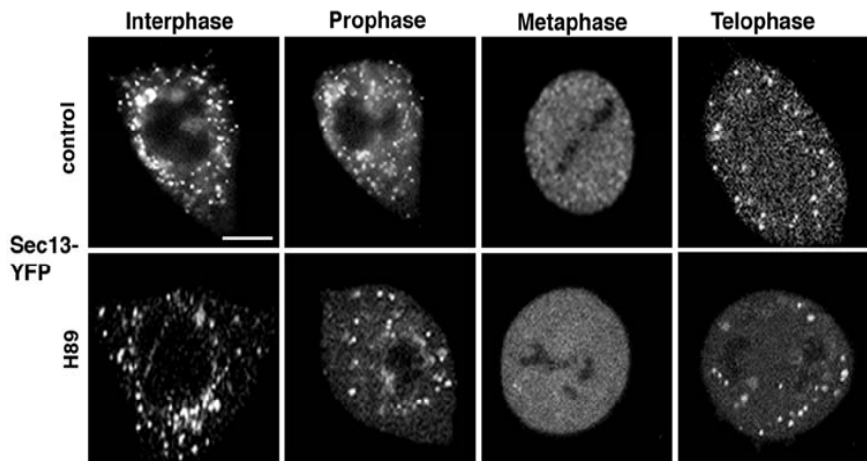

Supplement: pnas_100_23_13314__6.pdf [file pnas_100_23_13314__6.pdf]

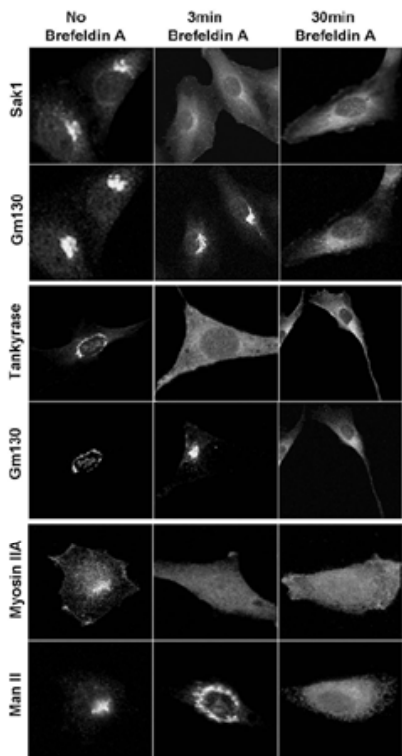

Supplement: pnas_100_23_13314__8.pdf [file pnas_100_23_13314__8.pdf]
